# Supplementary material for: Emotion Recognition in a Multi-Componential Framework: The Role of Physiology
Source: Frontiers journal article supplement (doi:10.3389/fcomp.2022.773256), 2022-01-28

## ***SUPPLEMENTAL MATERIAL***

**Table S1. List of the 40 selected film excerpts.** Duration (in seconds), the pre-labelled emotions and the number of highly emotional segments are presented.

| <b>Film excerpts</b>          | <b>Duration (s)</b> | <b>Pre-labelled emotions</b> | <b>Segments</b> |
|-------------------------------|---------------------|------------------------------|-----------------|
| 12 Years A Slave              | 120                 | Anger                        | 4               |
| 28 Days Later                 | 143                 | Fear                         | 4               |
| 28 Days Later                 | 49                  | Anxiety                      | 4               |
| 28 Days Later                 | 125                 | Fear                         | 4               |
| A Fish Called Wanda           | 173                 | Joy                          | 4               |
| American History X            | 77                  | Anxiety                      | 4               |
| Bambi                         | 86                  | Love                         | 2               |
| Batman Returns                | 73                  | Surprise                     | 3               |
| Cry Freedom                   | 132                 | Disgust                      | 4               |
| Dangerous Minds               | 128                 | Sadness                      | 2               |
| Edward Scissorhands           | 93                  | Calm                         | 4               |
| Forrest Gump                  | 121                 | Love                         | 3               |
| Ghost                         | 215                 | Love                         | 4               |
| Hotel Rwanda                  | 209                 | Sadness                      | 4               |
| Hotel Rwanda                  | 96                  | Sadness                      | 2               |
| Hotel Rwanda                  | 97                  | Anger                        | 3               |
| Kill Bill 1                   | 68                  | Surprise                     | 2               |
| Kill Bill 1                   | 144                 | Surprise                     | 2               |
| Life Is Beautiful             | 127                 | Anger                        | 3               |
| Life Is Beautiful             | 105                 | Love                         | 2               |
| Love Actually                 | 76                  | Joy                          | 3               |
| Love Actually                 | 104                 | Joy                          | 4               |
| Love Actually                 | 28                  | Satisfaction                 | 1               |
| Mr. Bean's Holiday            | 128                 | Joy                          | 4               |
| My Girl                       | 146                 | Sadness                      | 2               |
| Planet Earth                  | 66                  | Calm                         | 3               |
| Pride And Prejudice           | 91                  | Calm                         | 3               |
| Remember The Titans           | 132                 | Satisfaction                 | 3               |
| Schindler's List              | 115                 | Disgust                      | 2               |
| Scream 2                      | 215                 | Fear                         | 4               |
| Terminator 2                  | 131                 | Satisfaction                 | 4               |
| The Dentist                   | 56                  | Fear                         | 2               |
| The Fly                       | 81                  | Anxiety                      | 3               |
| The Pianist                   | 81                  | Anger                        | 2               |
| The Pianist                   | 117                 | Anxiety                      | 2               |
| There Is Something About Mary | 175                 | Surprise                     | 4               |
| The Shining                   | 85                  | Satisfaction                 | 2               |
| Trainspotting                 | 104                 | Disgust                      | 3               |
| Trainspotting                 | 62                  | Disgust                      | 1               |
| Wild Alaska                   | 62                  | Calm                         | 2               |

*Figure S1. Histogram of discrete emotions.* Frequency distribution in the assessments of 119 emotional events per 20 participants. The red line indicates the ideal frequency if the samples were equally distributed.

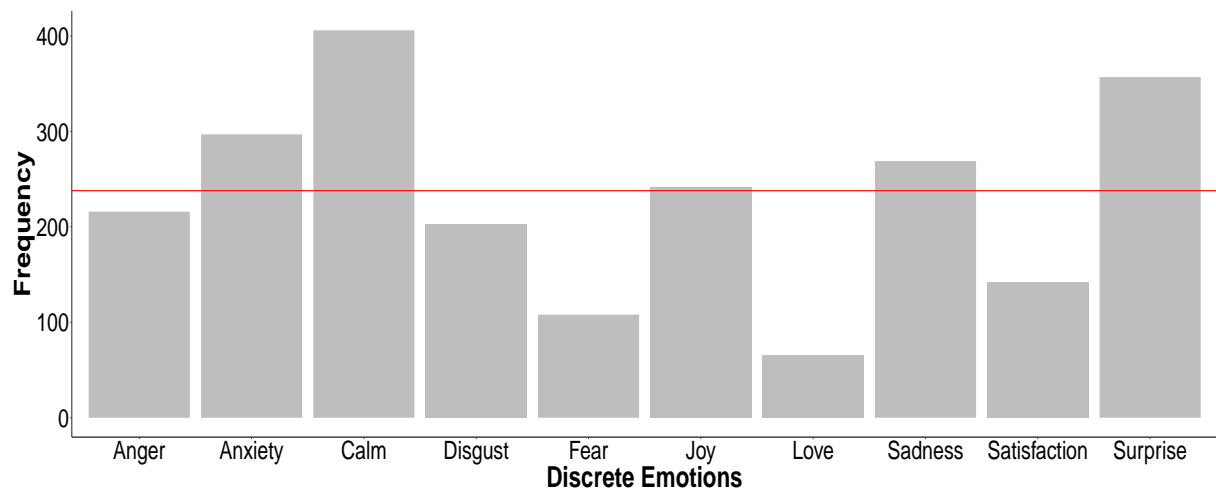

Supplement: Data_Sheet_1.pdf [file Data_Sheet_1.pdf]
